# Supplementary material for: The Association of the Oral Microbiota with the Effects of Acid Stress Induced by an Increase of Brain Lactate in Schizophrenia Patients
Source: MDPI journal article supplement (doi:10.3390/biomedicines11020240), 2023-01-17
Supplement: s1 [file s1]

**Supplementary data.** Descriptive statistics for the analyzed variables in the identified clusters of individuals. Clustering results of the variables used for analysis: DUP - duration of untreated psychosis; number of hospitalizations; New P\_1 - subscale P of the PANSS scale - at week 1 of follow-up; pos\_1 - positive symptoms at week 1 of follow-up: (delusions (P1), hallucinations (P3), haughtiness (P5), suspicion/preoccupation (P6), stereotyped thinking (N7), somatic distress (G1), unusual thought content (G9), lack of judgment and insight (G12)); neg\_1 - negative symptoms in the first week of follow-up: (blunted affect (N1), emotional withdrawal (N2), poor contact (N3), passive/apathetic social withdrawal (N4), lack of spontaneity (N6), motor delay (G7), active social avoidance (G16)); dis\_1 - disorganized thoughts in the first week of observation: (difficulties in abstract thinking (N5), mannerisms/positions (G5), disorientation (G10), poor attention (G11), disruption of will (G13), preoccupation (G15), conceptual disorganization (P2)); exc\_1 - uncontrolled hostility/excitement in the first week of observation: (excitement (P4), hostility (P7), uncooperativeness (G8)), PANSS\_emo ("anxiety/depression": anxiety (G2), guilt (G3), tension (G4), depression (G6)); emo\_1 - anxiety/depression in the first week of follow-up (anxiety (G2), guilt (G3), tension (G4), depression (G6)). STAIfeature\_1 - State and Trait Anxiety Inventory/trait - at 1 week of follow-up; BDI\_1 - Beck Depression Scale - at 1 week of follow-up; Calgary\_1 - scale for assessing depression in schizophrenia - at 1 week of follow-up; MoCA\_1 - Montreal Cognitive Function Assessment Scale - at 1 week of follow-up; CTQ\_EN - Childhood Trauma Questionnaire - accounting for emotional abandonment; CTQ\_EA - Childhood Trauma Questionnaire - accounting for emotional abuse; CTQ\_PN - Childhood Trauma Questionnaire - responsible for physical abandonment; CTQ\_PA - Childhood Trauma Questionnaire - responsible for physical abuse; CTQ\_SA - Childhood Trauma Questionnaire - responsible for sexual abuse; CTQ\_M - Childhood Trauma Questionnaire - responsible for minimizing trauma; PAS\_C - Pre-Disorder Attachment Scale - related to childhood; PAS\_EA - Pre-disease Adjustment Scale - related to early adolescence; PAS\_LA - Pre-disease Adjustment Scale - related to late adolescence; PAS\_A - Pre-disease Adjustment Scale - related to adulthood; PASG\_B - Pre-disease Adjustment Scale - related to total scale; PAST\_B - Pre-disease Adjustment Scale - total scale; 5HT - blood serotonin concentration in [ng/mL]; TRP - blood tryptophan concentration in [μg/mL]; GLUT - blood glutamic acid concentration in [μg/mL]; GLUT1 - blood glutamine concentration in [μg/mL]; LAC - blood lactate concentration [mM]; ALA - blood alanine concentration [mM]; 1 - subjects with higher T-scores (cluster 1); 2 - subjects with lower T-scores (cluster 2).

| Variable           | Focus no. | M     | SD    | Min  | Max | Q1    | Me   | Q3    | Statistical test result |
|--------------------|-----------|-------|-------|------|-----|-------|------|-------|-------------------------|
| Age                | 1         | 23.45 | 7.79  | 15   | 37  | 16.25 | 21   | 31.25 | U = 193; p = 0.85       |
|                    | 2         | 21.9  | 7.08  | 15   | 38  | 17    | 18   | 28    |                         |
| DUP                | 1         | 27.15 | 24.64 | 3    | 84  | 7     | 20.5 | 49.5  | U = 165.5; p = 0.35     |
|                    | 2         | 21.45 | 30.62 | 3    | 140 | 7     | 14   | 21    |                         |
| hospi              | 1         | 60.95 | 32.35 | 20   | 158 | 36.5  | 53.5 | 70.25 | U = 169.5; p = 0.41     |
|                    | 2         | 67.5  | 34.48 | 14   | 171 | 47    | 63   | 84.5  |                         |
| Age of Episode I   | 1         | 18.85 | 3.44  | 15   | 29  | 16    | 17.5 | 20.75 | U = 198.5; p = 0.97     |
|                    | 2         | 18.7  | 4.13  | 12   | 28  | 16.25 | 17.5 | 21.75 |                         |
| Number of episodes | 1         | 3.85  | 4.39  | 1    | 15  | 1     | 1    | 7.5   | U = 195.5; p = 0.89     |
|                    | 2         | 3.05  | 3.14  | 1    | 11  | 1     | 1    | 5     |                         |
| Duration           | 1         | 4.38  | 6.5   | 0.1  | 21  | 0.15  | 0.32 | 10.5  | U = 191.5; p = 0.82     |
|                    | 2         | 3.3   | 4.77  | 0.05 | 15  | 0.17  | 0.34 | 5.75  |                         |
| New P_1            | 1         | 28.7  | 7.27  | 15   | 36  | 21.25 | 32.5 | 34.75 | U = 165; p = 0.34       |
|                    | 2         | 27.05 | 6.1   | 17   | 38  | 22    | 26.5 | 31.75 |                         |

|                   |   |       |       |    |     |       |       |        |                     |
|-------------------|---|-------|-------|----|-----|-------|-------|--------|---------------------|
| New N_1           | 1 | 25.2  | 5.89  | 12 | 33  | 21.25 | 26.5  | 29.75  | U = 197.5; p = 0.95 |
|                   | 2 | 26.2  | 5.26  | 18 | 39  | 23.25 | 25.5  | 28.75  |                     |
| New G_1           | 1 | 53.6  | 11.83 | 25 | 70  | 44.75 | 54    | 64.25  | U = 196.5; p = 0.92 |
|                   | 2 | 54.65 | 9.42  | 40 | 69  | 46    | 55    | 62.75  |                     |
| New T_1           | 1 | 107.5 | 22.04 | 69 | 134 | 89.25 | 115   | 128.25 | U = 196; p = 0.91   |
|                   | 2 | 107.9 | 18.83 | 81 | 141 | 89.5  | 110.5 | 122.5  |                     |
| pos_1             | 1 | 21.35 | 5.37  | 10 | 27  | 17    | 23.5  | 25     | U = 175.5; p = 0.51 |
|                   | 2 | 20.85 | 4.38  | 13 | 29  | 17.25 | 21    | 24     |                     |
| neg_1             | 1 | 25.35 | 5.8   | 14 | 35  | 21    | 26.5  | 30     | U = 190; p = 0.79   |
|                   | 2 | 27.05 | 6.79  | 16 | 46  | 24    | 26.5  | 29.75  |                     |
| dis_1             | 1 | 21.3  | 5.65  | 10 | 32  | 18    | 21.5  | 24     | U = 165.5; p = 0.35 |
|                   | 2 | 19.5  | 5.06  | 12 | 28  | 15.25 | 18    | 23.75  |                     |
| exc_1             | 1 | 13.7  | 5.05  | 5  | 21  | 9     | 15    | 17.75  | U = 173; p = 0.46   |
|                   | 2 | 12.45 | 4.16  | 5  | 20  | 9     | 12    | 16     |                     |
| emo_1             | 1 | 11.9  | 3.06  | 5  | 18  | 10    | 12    | 14     | U = 132.5; p = 0.07 |
|                   | 2 | 13.85 | 2.96  | 8  | 18  | 12    | 13.5  | 16.75  |                     |
| STAI<br>feature_1 | 1 | 58.6  | 6.44  | 47 | 70  | 55.25 | 59.5  | 63.5   | U = 184.5; p = 0.67 |
|                   | 2 | 59.25 | 7.67  | 49 | 70  | 50.25 | 60    | 67.25  |                     |
| STAI state_1      | 1 | 56.85 | 7.03  | 45 | 75  | 53.5  | 57.5  | 59.75  | U = 199.5; p = 0.99 |
|                   | 2 | 56.25 | 6.76  | 47 | 65  | 49    | 55.5  | 62.75  |                     |
| BDI_1             | 1 | 10.5  | 4.58  | 3  | 22  | 7.25  | 11.5  | 13     | U = 187; p = 0.72   |
|                   | 2 | 10.85 | 4.78  | 2  | 20  | 9     | 10.5  | 14.75  |                     |
| Calgary_1         | 1 | 3.8   | 1.91  | 1  | 10  | 3     | 3.5   | 4.75   | U = 185.5; p = 0.69 |
|                   | 2 | 4.15  | 2.62  | 1  | 10  | 2     | 4     | 5.75   |                     |
| MoCA_1            | 1 | 15.2  | 3.16  | 9  | 21  | 13    | 15    | 17.75  | U = 184; p = 0.66   |
|                   | 2 | 15.8  | 3.87  | 10 | 22  | 12    | 16    | 18.75  |                     |
| CTQ_EN            | 1 | 16.75 | 4.58  | 8  | 24  | 14    | 17    | 20     | U = 198; p = 0.96   |
|                   | 2 | 16.95 | 4.63  | 8  | 24  | 13.25 | 17    | 20.5   |                     |
| CTQ_EA            | 1 | 14.45 | 4.16  | 7  | 23  | 12    | 14    | 18     | U = 169.5; p = 0.41 |
|                   | 2 | 13.35 | 4.59  | 6  | 21  | 10    | 13    | 17.5   |                     |
| CTQ_PN            | 1 | 12.4  | 4.77  | 5  | 21  | 9.25  | 10.5  | 16     | U = 170.5; p = 0.42 |
|                   | 2 | 11.1  | 4.2   | 6  | 21  | 8     | 10.5  | 13.75  |                     |

|                |   |        |       |       |         |       |        |        |                    |
|----------------|---|--------|-------|-------|---------|-------|--------|--------|--------------------|
| CTQ_PA         | 1 | 9.5    | 3.09  | 6     | 16      | 6.5   | 8.5    | 12     | U = 147; p = 0.14  |
|                | 2 | 8.75   | 4.45  | 5     | 19      | 6     | 8      | 9.5    |                    |
| CTQ_SA         | 1 | 6.4    | 3.5   | 5     | 20      | 5     | 5      | 6      | U = 170; p = 0.27  |
|                | 2 | 5.9    | 3.16  | 5     | 19      | 5     | 5      | 5      |                    |
| CTQ_M          | 1 | 4.5    | 1.43  | 3     | 8       | 3     | 4      | 5      | U = 167; p = 0.35  |
|                | 2 | 4.45   | 2.37  | 3     | 13      | 3     | 4      | 4.75   |                    |
| PAS_C          | 1 | 0.62   | 0.17  | 0.17  | 0.83    | 0.54  | 0.66   | 0.75   | U = 90.5; p = 0.16 |
|                | 2 | 0.56   | 0.15  | 0.25  | 0.83    | 0.45  | 0.58   | 0.65   |                    |
| PAS_EA         | 1 | 0.49   | 0.18  | 0.25  | 0.83    | 0.4   | 0.47   | 0.67   | U = 95.5; p = 0.22 |
|                | 2 | 0.55   | 0.18  | 0.1   | 0.9     | 0.44  | 0.53   | 0.67   |                    |
| PAS_LA         | 1 | 0.49   | 0.2   | 0     | 0.87    | 0.4   | 0.47   | 0.6    | U = 82; p = 0.08   |
|                | 2 | 0.59   | 0.19  | 0.2   | 0.9     | 0.53  | 0.6    | 0.67   |                    |
| PAS_A          | 1 | 0.26   | 0.31  | 0     | 0.67    | 0     | 0      | 0.66   | U = 119; p = 0.73  |
|                | 2 | 0.27   | 0.35  | 0     | 0.83    | 0     | 0      | 0.67   |                    |
| PASG_B         | 1 | 0.51   | 0.17  | 0.22  | 0.76    | 0.41  | 0.55   | 0.63   | U = 80.5; p = 0.08 |
|                | 2 | 0.6    | 0.2   | 0.15  | 0.78    | 0.48  | 0.69   | 0.74   |                    |
| PAST_B         | 1 | 2.29   | 0.58  | 1.16  | 3.39    | 2.09  | 2.33   | 2.6    | U = 86; p = 0.12   |
|                | 2 | 2.62   | 0.74  | 0.92  | 3.99    | 2.14  | 2.72   | 3.04   |                    |
| Dosage         | 1 | 12.25  | 44.32 | 0     | 200     | 0     | 2      | 3.75   | U = 175; p = 0.49  |
|                | 2 | 3.03   | 2.62  | 0     | 10      | 2     | 2      | 3.75   |                    |
| Chlorpromazine | 1 | 88.33  | 95.99 | 0     | 300     | 0     | 75     | 150    | U = 168; p = 0.37  |
|                | 2 | 100    | 56.2  | 0     | 200     | 100   | 100    | 137.5  |                    |
| 5HT            | 1 | 180.26 | 203.5 | 89.7  | 1003.34 | 94.84 | 133.4  | 178.08 | U = 179; p = 0.76  |
|                | 2 | 130.09 | 32.02 | 78.99 | 200.96  | 104.5 | 125.48 | 150.72 |                    |
| TRP            | 1 | 3.54   | 6.14  | 0.16  | 28.46   | 1.01  | 2.21   | 3.08   | U = 189; p = 0.98  |
|                | 2 | 2.27   | 1.3   | 0.22  | 5.49    | 1.12  | 2.11   | 3.31   |                    |
| GLUT           | 1 | 17.01  | 6.54  | 8.93  | 28.96   | 11.45 | 15.17  | 22.35  | U = 162; p = 0.43  |
|                | 2 | 15.15  | 5.71  | 7.46  | 25.36   | 9.81  | 14.64  | 20.68  |                    |
| GLUT1          | 1 | 2.85   | 3.84  | 1.08  | 18.51   | 1.57  | 2.04   | 2.3    | U = 189; p = 0.98  |
|                | 2 | 2      | 0.38  | 1.33  | 2.89    | 1.74  | 1.9    | 2.22   |                    |
| LAC            | 1 | 1.71   | 0.49  | 1.02  | 2.87    | 1.35  | 1.67   | 2.17   | U = 141; p = 0.17  |
|                | 2 | 1.53   | 0.34  | 1.11  | 2.13    | 1.19  | 1.48   | 1.85   |                    |

|                 |   |         |          |         |         |         |         |         |                                       |
|-----------------|---|---------|----------|---------|---------|---------|---------|---------|---------------------------------------|
| <b>ALA</b>      | 1 | 0.51    | 0.14     | 0.34    | 0.74    | 0.39    | 0.47    | 0.65    | U = 186; p = 0.91                     |
|                 | 2 | 0.49    | 0.12     | 0.31    | 0.68    | 0.39    | 0.46    | 0.59    |                                       |
| <b>Hamilton</b> | 1 | 10.58   | 4.25     | 3       | 18      | 7       | 11      | 14      | U = 154.5; p = 0.32                   |
|                 | 2 | 9.15    | 4.25     | 3       | 15      | 5.25    | 8       | 13.75   |                                       |
| <b>ACC_LAC</b>  | 1 | 3572742 | 1987859  | 1537700 | 6936500 | 1829300 | 2907700 | 6177600 | <b>U = 111; p = 0.03; eta² = 0.13</b> |
|                 | 2 | 5279910 | 2061542  | 1318100 | 7523500 | 2925175 | 6176900 | 6740850 |                                       |
| <b>ACC_ALA</b>  | 1 | 2110026 | 884824.9 | 683790  | 3622900 | 1307000 | 2056800 | 3245100 | <b>U = 117; p = 0.04; eta² = 0.11</b> |
|                 | 2 | 2781855 | 733439.6 | 1116900 | 4029500 | 2154325 | 2957600 | 3318575 |                                       |
